# Supplementary material for: Discriminative modulation of the highest occupied molecular orbital energies of graphene and carbon nanotubes induced by charging
Source: Royal Society of Chemistry journal article supplement (doi:10.1039/c4cp05418k), 2015-01-01
Supplement: c4cp05418k1.pdf [file c4cp05418k1.pdf]

## Supplementary Information

### Discriminative modulation of the highest occupied molecular orbital energies of graphene and carbon nanotubes induced by charging

Hongping Yang <sup>a</sup>, Chi-yung Yam <sup>b</sup>, Aihua Zhang <sup>c</sup>, Zhiping Xu <sup>d,e</sup>, Jun Luo <sup>\*a,d</sup> and Jing Zhu <sup>\*a,d</sup>

<sup>a</sup> National Center for Electron Microscopy in Beijing, School of Materials Science and Engineering, The State Key Laboratory of New Ceramics and Fine Processing, Key Laboratory of Advanced Materials (MOE), Tsinghua University, Beijing, 100084, P. R. China. Tel: +86 10 62782347, +86 10 62794026. E-mail address: jluo@mail.tsinghua.edu.cn (Jun Luo), jzhu@mail.tsinghua.edu.cn (Jing Zhu)

<sup>b</sup> Beijing Computational Science Research Center, Beijing 100084, P. R. China

<sup>c</sup> Beijing Institute of Nanoenergy and Nanosystems, Chinese Academy of Sciences, Beijing, 100083, P. R. China

<sup>d</sup> Center for Nano and Micro Mechanics, Tsinghua University, Beijing, 100084, P. R. China

<sup>e</sup> Department of Engineering Mechanics, School of Aerospace, Tsinghua University, Beijing, 100084, P. R. China

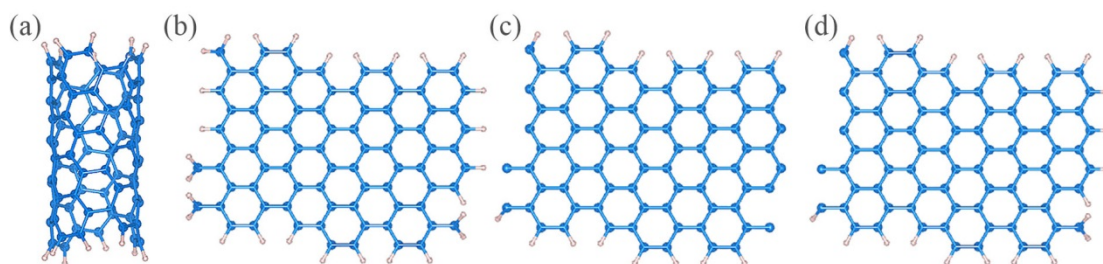

**Fig. S1** Models of the (3,5) CNT containing 80 carbon atoms and its corresponding GS. (a) The CNT model with all the edges terminated by 16 hydrogen atoms. (b) The GS model with all the edges terminated by 28 hydrogen atoms. (c) The GS model with 16 hydrogen atoms, where only the edges originally from the CNT model are terminated by hydrogen atoms. (d) The GS model with the edges terminated by 22 hydrogen atoms. The models in (a, b) are the same as those in Fig. 1(a, b) of the main text.

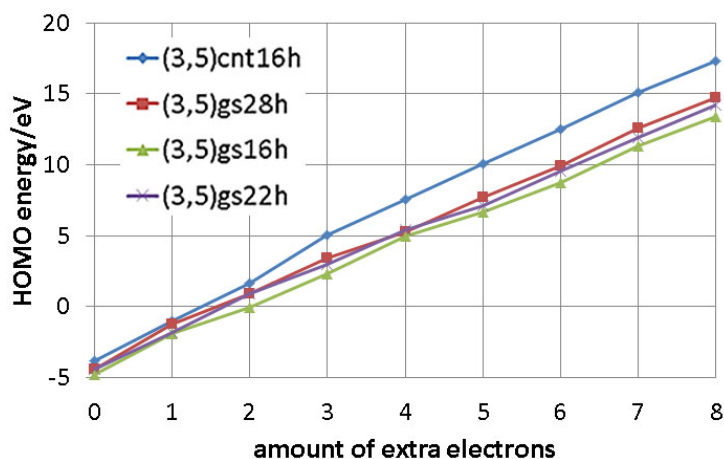

**Fig. S2** Dependences of the HOMO energies of the (3,5) CNT and corresponding unzipped GS with different hydrogen atoms on the amount of the extra electrons, where the vacuum energy is set at 0 eV.
